# Supplementary material for: Mammographic Breast Density Model Using Semi-Supervised Learning Reduces Inter-/Intra-Reader Variability
Source: MDPI journal article supplement (doi:10.3390/diagnostics13162694), 2023-08-16
Supplement: s1 [file s1]

**Table S1.** Precision, recall, and F1-score are presented for the DL model for the four categories of breast density (A–D) and for binary assessment of dense versus non-dense.

| Density      | Precision | Recall | F-1 score | Case Number (N) |
|--------------|-----------|--------|-----------|-----------------|
| A            | 0.84      | 0.75   | 0.79      | 110             |
| B            | 0.84      | 0.84   | 0.84      | 269             |
| C            | 0.92      | 0.96   | 0.94      | 467             |
| D            | 0.93      | 0.85   | 0.89      | 82              |
| accuracy     |           |        | 0.89      | 928             |
| macro avg    | 0.88      | 0.85   | 0.86      | 928             |
| weighted avg | 0.89      | 0.89   | 0.89      | 928             |
|              | Precision | Recall | F-1 score | Case Number (N) |
| Non-Dense    | 0.96      | 0.93   | 0.94      | 379             |
| Dense        | 0.95      | 0.97   | 0.96      | 549             |
| accuracy     |           |        | 0.95      | 928             |
| macro avg    | 0.96      | 0.95   | 0.95      | 928             |
| weighted avg | 0.95      | 0.95   | 0.95      | 928             |
